# Supplementary material for: Influence of Storage Conditions and Preservatives on Metabolite Fingerprints in Urine
Source: MDPI journal article supplement (doi:10.3390/metabo9100203), 2019-09-27
Supplement: s1 [file s1]

## **Supplementary Materials**

### **Influence of Storage Conditions and Preservatives on Metabolite Fingerprints in Urine**

Xinchen Wang<sup>1,2+</sup>, Haiwei Gu<sup>2+</sup>, Susana A. Palma-Duran<sup>2</sup>, Andres Fierro<sup>2</sup>, Paniz

Jasbi<sup>2</sup>, Xiaojian Shi<sup>2</sup>, William Bresette<sup>2</sup>, Natasha Tasevska<sup>2\*</sup>

<sup>1</sup>Jiangxi Key Laboratory for Mass Spectrometry and Instrumentation, East China  
University of Technology, Nanchang, Jiangxi 330013, China

<sup>2</sup>College of Health Solutions, Arizona State University, Phoenix, AZ 85004, USA

<sup>+</sup>These authors contributed equally to the study

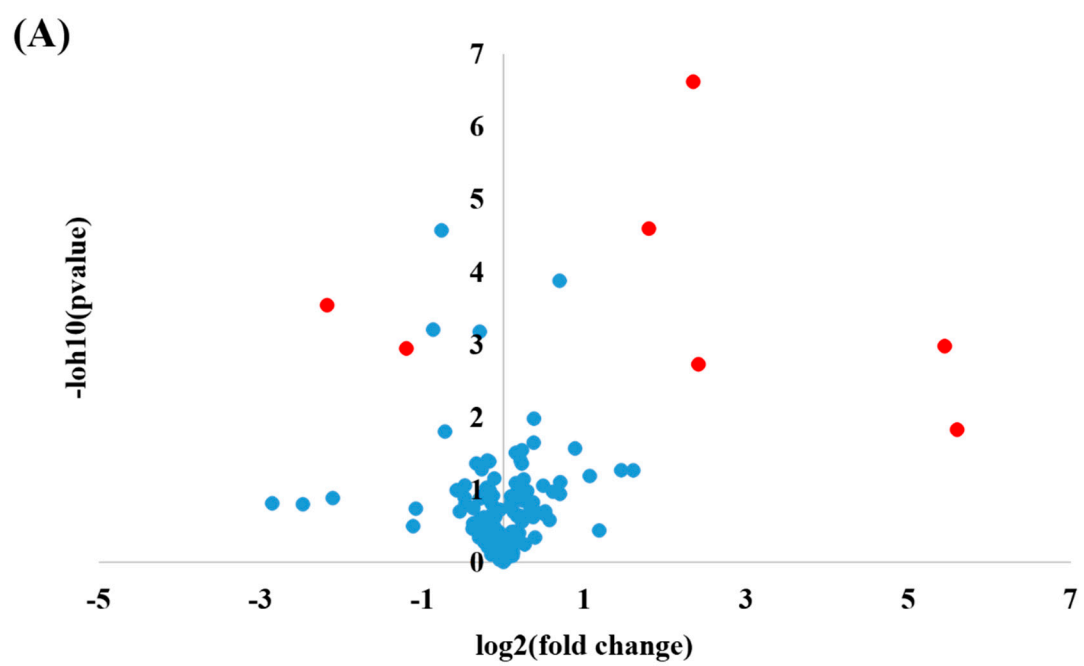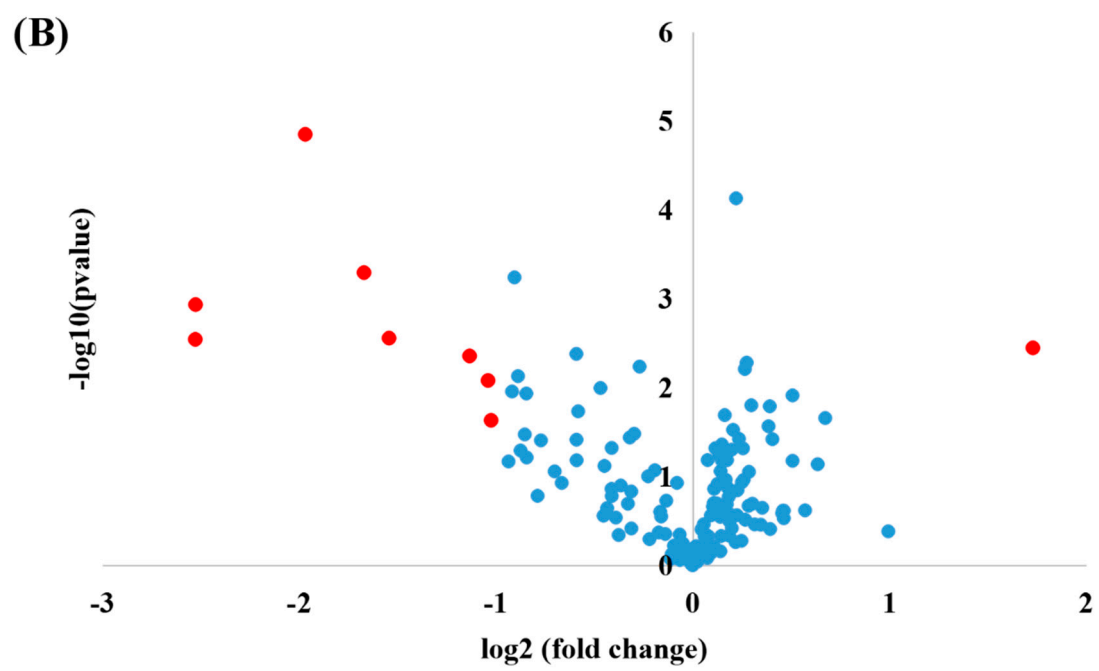

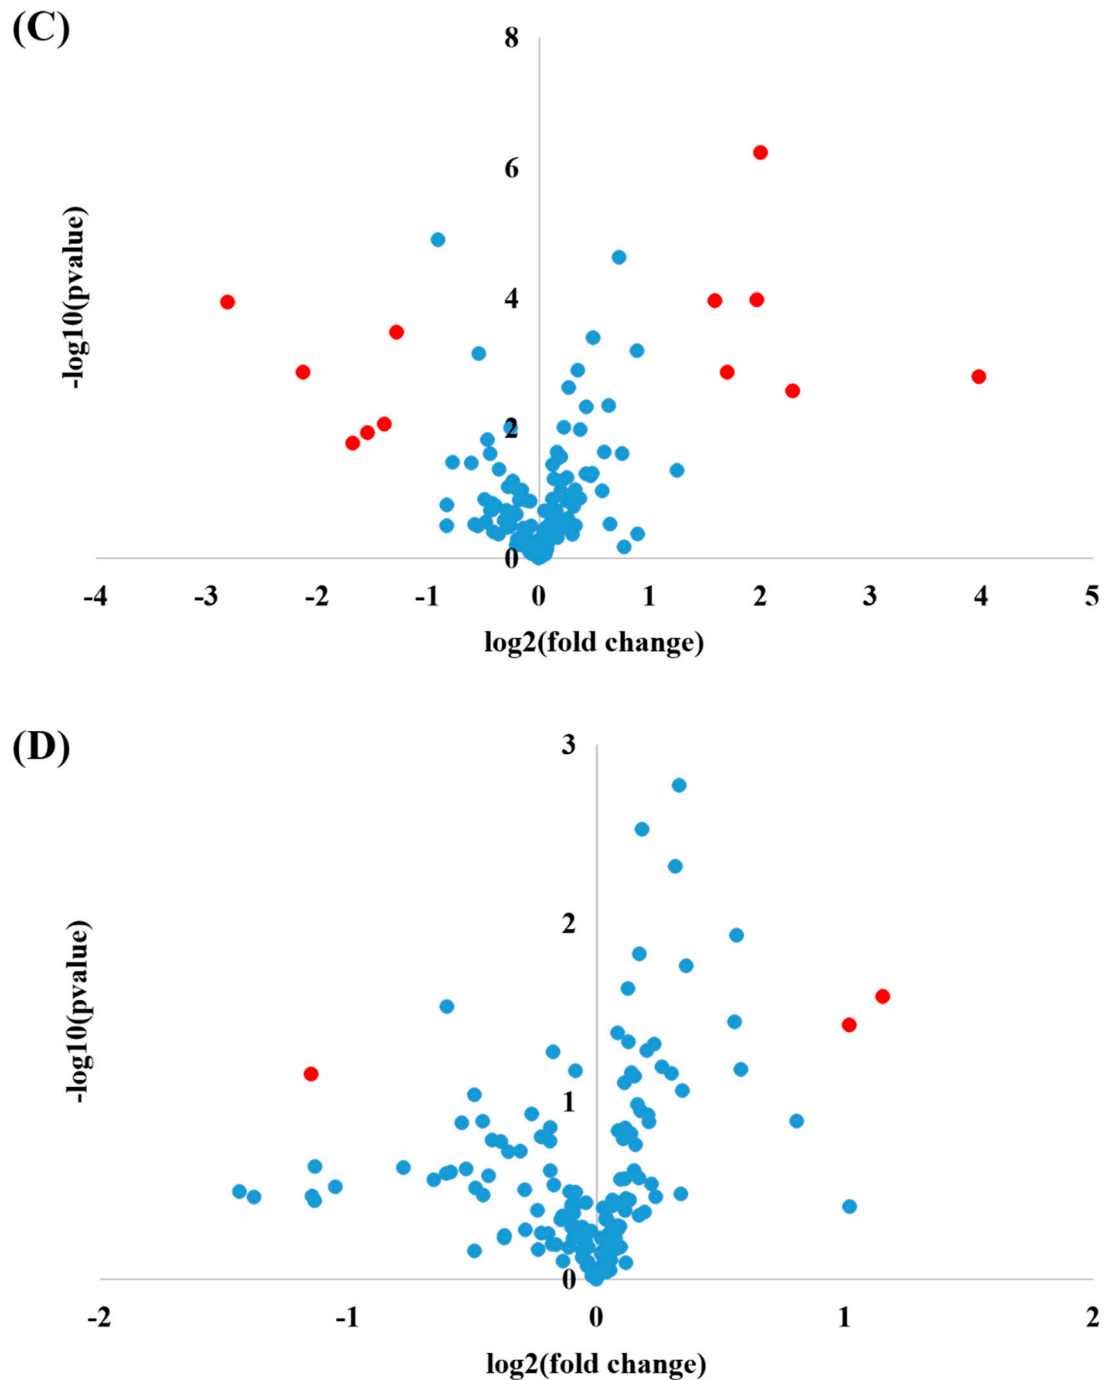

**Supplementary Figure 1.** Volcano plots of no preservative versus preservatives for urine samples stored at  $-20^{\circ}\text{C}$ ,  $4^{\circ}\text{C}$  for 24-h/48-h, and at  $22^{\circ}\text{C}$  for 24-h **in the PABA group:** (A) no preservative versus boric acid, (B) no preservative vs. thymol; and **in the No PABA group:** (C) no preservative vs. boric acid, (D) no preservative vs. thymol. Red dots indicate metabolites with p-value  $< 0.05$  and fold change  $> 2$  or  $< 0.5$ .

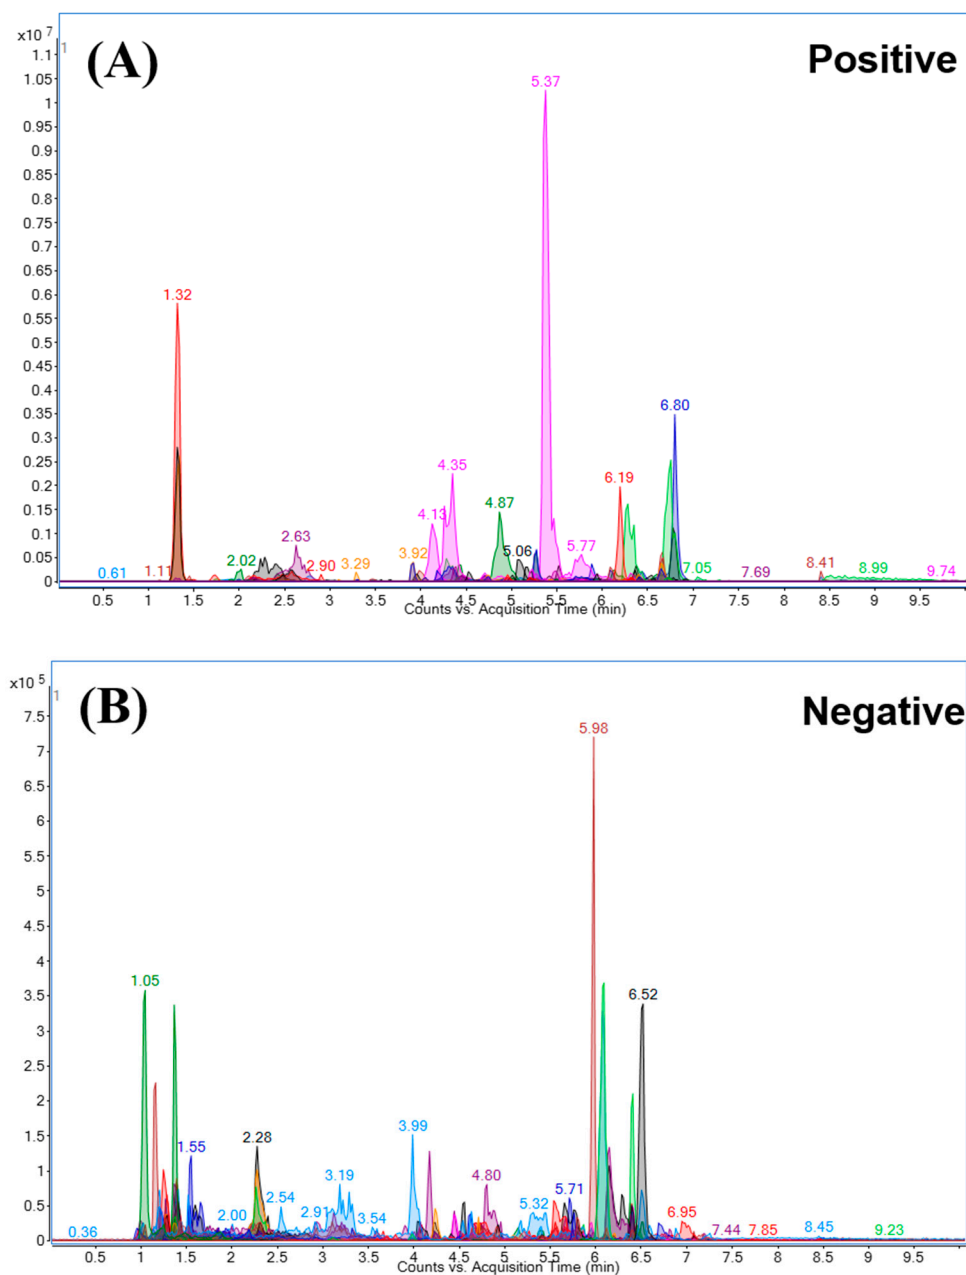

**Supplementary Figure 2.** Chromatograms by targeted liquid chromatography tandem mass spectrometry (LC-MS/MS)-based metabolomics in (A) positive ion mode and (B) negative ion mode.

**Supplementary Table 1.** Significantly altered metabolites caused by boric acid and thymol compared to urine samples with No Preservative stored at -20°C, 4°C for 24-h/48-h, and at 22°C for 24-h in the PABA and No PABA Group

| Metabolite                     | P-value | Fold Change (NP)/(BA) | Metabolite changes* |
|--------------------------------|---------|-----------------------|---------------------|
| <b>PABA group</b>              |         |                       |                     |
| Boric Acid vs. No Preservative |         |                       |                     |
| Pyridoxine                     | 0.015   | 49.600                | Decreased           |
| 2-Deoxyadenosine               | 0.001   | 38.289                | Decreased           |
| D-Galacturonic acid            | 0.002   | 5.054                 | Decreased           |
| belta-Hydroxyisovaleric acid   | <0.001  | 4.787                 | Decreased           |
| Xanthurenic acid               | <0.001  | 3.631                 | Decreased           |
| Adenosine                      | <0.001  | 0.205                 | Increased           |
| GA3P                           | 0.001   | 0.428                 | Increased           |
| Thymol vs. No Preservative     |         |                       |                     |
| 3-Methyladipic acid            | <0.001  | 3.708                 | Decreased           |
| 3-Hexenedioic acid             | <0.001  | 0.176                 | Increased           |
| Isovaleric acid                | <0.001  | 0.232                 | Increased           |
| Agmatine                       | <0.001  | 0.322                 | Increased           |
| Dopamine                       | 0.015   | 0.444                 | Increased           |
| Citrulline                     | 0.003   | 0.454                 | Increased           |
| Alpha-KG/Adipic acid           | 0.016   | 0.465                 | Increased           |
| 2-Methylglutaric acid          | 0.030   | 0.473                 | Increased           |
| Glutamic acid                  | 0.044   | 0.494                 | Increased           |
| <b>No PABA Group</b>           |         |                       |                     |
| Boric Acid vs. No Preservative |         |                       |                     |
| 2-Deoxyadenosine               | <0.001  | 13.129                | Decreased           |
| Pyridoxine                     | 0.003   | 4.909                 | Decreased           |
| Adenine                        | 0.001   | 3.257                 | Decreased           |
| Xanthurenic acid               | <0.001  | 4.344                 | Decreased           |
| Belta-Hydroxyisovaleric acid   | <0.001  | 3.969                 | Decreased           |

|                                        |        |       |           |
|----------------------------------------|--------|-------|-----------|
| D-Galacturonic acid                    | <0.001 | 3.017 | Decreased |
| Isovaleric acid                        | 0.001  | 0.229 | Increased |
| Adenosine                              | 0.001  | 0.168 | Increased |
| Alpha-KG/Adipic acid                   | <0.001 | 0.411 | Increased |
| Dopamine                               | 0.002  | 0.263 | Increased |
| Pentadecanoic acid                     | 0.002  | 0.380 | Increased |
| Phenylglyoxylic acid                   | 0.005  | 0.394 | Increased |
| <hr/> Thymol vs. No Preservative <hr/> |        |       |           |
| Tryptamine                             | 0.009  | 2.013 | Decreased |
| Anthranilic acid                       | 0.026  | 2.225 | Decreased |
| Lauric acid                            | 0.031  | 0.480 | Increased |
